# Supplementary material for: A ternary composite with manganese dioxide nanorods and graphene nanoribbons embedded in a polyaniline matrix for high-performance supercapacitors
Source: Royal Society of Chemistry journal article supplement (doi:10.1039/c7ra05443b), 2017-01-01
Supplement: c7ra05443b1.pdf [file c7ra05443b1.pdf]

## Support Information

### **A Ternary Composite with Manganese Dioxide Nanorods and Graphene Nanoribbons Embedded in Polyaniline Matrix for High-Performance Supercapacitors**

Tong Wu<sup>a</sup>, Chaonan Wang<sup>b</sup>, Yao Mo<sup>a</sup>, Xinran Wang<sup>a</sup>, Jinchen Fan<sup>a\*</sup>, Qunjie Xu <sup>a\*</sup>  
and Yulin Min <sup>a\*</sup>

<sup>a</sup> Shanghai Key Laboratory of Materials Protection and Advanced Materials in  
Electric Power, College of Environmental and Chemical Engineering, Shanghai  
University of Electric Power, Shanghai 200090, People's Republic of China.

<sup>b</sup> College of Materials Science and Engineering, Guizhou Minzu University, Guiyang  
550025, People's Republic of China.

\* Corresponding authors. E-mail address: Jinchen.fan@shiep.edu.cn (J.C. Fan),  
xuqunjie@shiep.edu.cn (Q.J. Xu), minyulin@shiep.edu.cn (Y.L. Min)

Tel: +86 21 35303544

Fax: +86 21 35303544

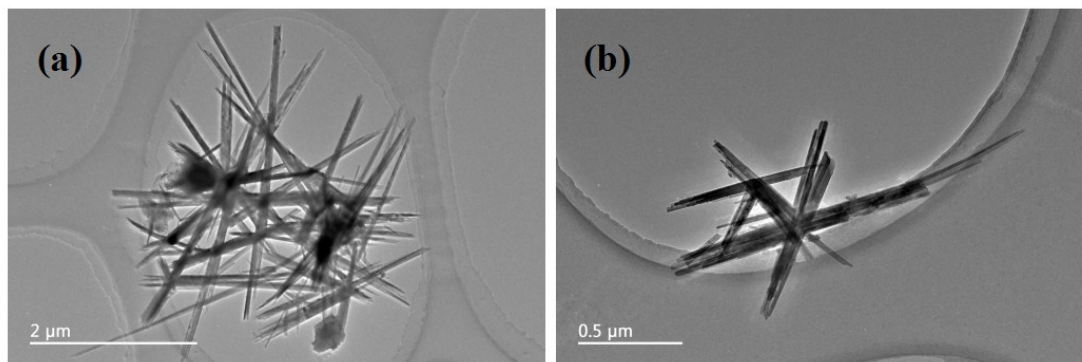

**Fig. S1** Selected TEM images of as-prepared MnO<sub>2</sub> nanorods

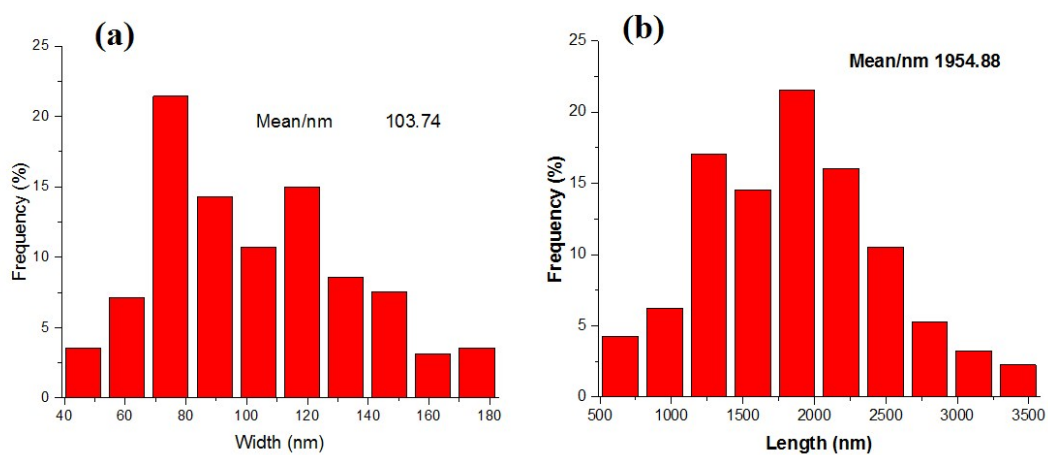

**Fig.S2** Width (a) and length (b) distributions of as-prepared MnO<sub>2</sub> nanorods

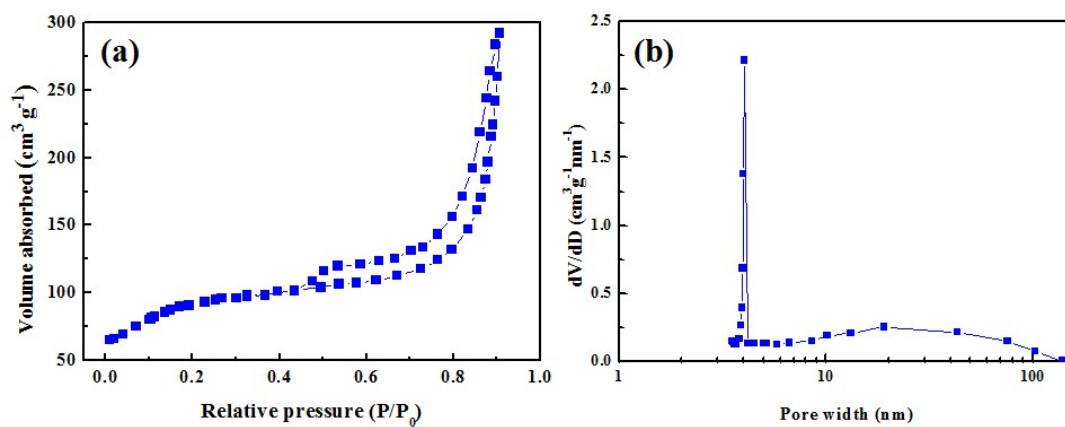

**Fig.S3** (a) N<sub>2</sub> adsorption/desorption isotherms and (b) pore size distribution curves of the MnO<sub>2</sub>/PANI/GNRs ternary composite
